# Supplementary material
Source: Research Square preprint supplement (doi:10.21203/rs.3.rs-9264911/v1)

**Association of Soil Physicochemical Properties with Bacterial Microbiome Structure in Cowpea Farms of Semi-Arid Eastern Kenya**

**Authors:**

Ahmed Kassem Khater¹˒²*, Ezekiel Mugendi Njeru³, Stephen Mwangi Githiri⁴

**Affiliations:**

¹ Department of Agricultural Biochemistry, Faculty of Agriculture, Al-Azhar University, Cairo, Egypt
² Department of Molecular Biology and Biotechnology, Pan African University Institute for Basic Sciences, Technology and Innovation (PAUSTI), Nairobi, Kenya
³ Department of Biochemistry, Microbiology and Biotechnology, Kenyatta University, Nairobi, Kenya
⁴ Department of Horticulture and Food Security, Jomo Kenyatta University of Agriculture and Technology (JKUAT), Nairobi, Kenya

**Corresponding author:**

Ahmed Kassem Khater ([akassem@azhar.edu.eg](mailto:akassem@azhar.edu.eg) ; ORCID: 0000-0002-7283-0690)

**Contact information for other authors:**

Ezekiel Mugendi Njeru: [njeru.ezekiel@ku.ac.ke](mailto:NJERU.EZEKIEL@ku.ac.ke)

Stephen Mwangi Githiri: githirim@agr.jkuat.ac.ke

**Table S1.** Sequencing summary and final retained reads.

| **SampleID** | **County** | **Input** | **Filtered** | **DenoisedF** | **DenoisedR** | **Merged** | **Nonchim** | **Final retained reads** |
| --- | --- | --- | --- | --- | --- | --- | --- | --- |
| KF1 | Kitui | 157037 | 153557 | 153172 | 153298 | 151260 | 147791 | 147742 |
| KF2 | Kitui | 142481 | 139324 | 139081 | 139157 | 137163 | 134363 | 134354 |
| KF3 | Kitui | 107181 | 105021 | 75505 | 90672 | 51655 | 45297 | 45284 |
| KF4 | Kitui | 83144 | 81468 | 54581 | 67926 | 36608 | 32650 | 32620 |
| KF5 | Kitui | 114951 | 112260 | 77547 | 95104 | 52766 | 46252 | 46208 |
| KF6 | Kitui | 103496 | 101509 | 71041 | 87400 | 50704 | 44231 | 44108 |
| MF1 | Machakos | 100347 | 98097 | 69171 | 83473 | 46216 | 38262 | 38241 |
| MF2 | Machakos | 116126 | 113548 | 82019 | 97664 | 57382 | 48487 | 48457 |
| MF3 | Machakos | 111046 | 108498 | 78741 | 93700 | 53614 | 43856 | 43798 |
| MF4 | Machakos | 123673 | 121109 | 87526 | 103466 | 58252 | 47579 | 47511 |
| MF5 | Machakos | 110531 | 108149 | 79270 | 93408 | 54663 | 42903 | 42854 |
| MF6 | Machakos | 93508 | 91494 | 61970 | 77612 | 43106 | 36292 | 36266 |

Input reads, filtered reads, denoised forward and reverse reads, merged reads, non-chimeric reads, and final retained reads are shown for each sample after DADA2 processing.

**Table S2.** Permutational multivariate analysis of variance (PERMANOVA) of bacterial community composition.

| **Source of variation** | **Df** | **Sum of squares** | **R2** | **F** | **P-value** |
| --- | --- | --- | --- | --- | --- |
| Model | 1 | 0.5855050 | 0.171917 | 2.07608 | 0.004 |
| Residual | 10 | 2.8202425 | 0.828083 | NA | NA |
| Total | 11 | 3.4057476 | 1 | NA | NA |

PERMANOVA was performed on Bray–Curtis dissimilarities to test differences in bacterial community composition between Kitui and Machakos counties. Df, degrees of freedom; *R*², proportion of variation explained; *F*, pseudo-*F* statistic; Pr(>F).

**Figure S1.** Sequencing depth and read retention across soil samples from Kitui and Machakos counties. Summary of sequencing depth and read retention after quality filtering, denoising, merging, and chimera removal for each sample.


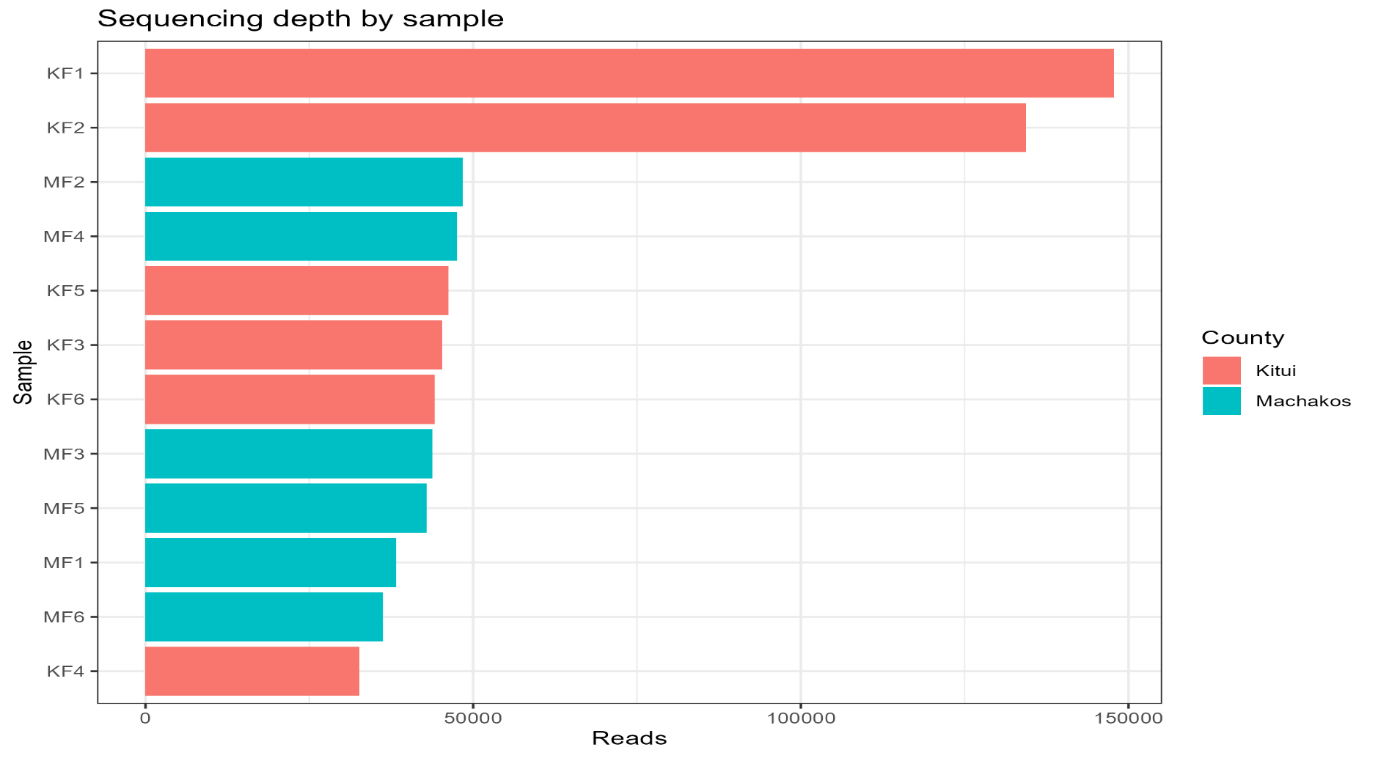

Supplement: Supplementary file 1 [file 03c5a62beae0ef2600fed323.docx]
